# Supplementary material
Source: HighWire-hosted journal article supplement (doi:10.1101/rna.075986.120)
Supplement: Supplemental_Tables.xlsx [file Supplemental_Tables.xlsx]

## Sheet: Index
Table Index
Type	Table	Contents
Molecular	M.1	Plasmids
	M.2	Oligos
Workflow	W.1	Read trimming
	W.2	Read mapping
	W.3	Filtering read mappings
	W.4	Library specificity
Stats Tests	T.1	Repeatabiltity of DMS modification
	T.2	Comparison of reactivity
	T.3	Correlation of Δ reactivity to Δ abundance
	T.4	Correlation of reactivity to abundance, individual structuromes
Data	D.1	Whole Transcript metrics
	D.2	5’UTR metrics
	D.3	CDS metrics
	D.4	3’UTR metrics
	D.5	+AA TPM
	D.6	-AA TPM
	D.7	+AA Individual Structurome
	D.8	-AA Individual Structurome
	D.9	Targeted 5’UTR metrics
	D.10	Targeted CDS metrics
Lists	L.1	Stringent Response subset
	L.2	CodY Regulon subset
	L.3	Targeted switches
	L.4	Nucleotide identities
	L.5	Targeted switches Sliding Window Analysis Results
	L.6	Transcriptome Sliding Window Analysis Results

## Sheet: M.1
Table M.1 Plasmids
Plasmid	Descriptiona	Source
pTZ19R	cloning vector	Thermo Fisher Scientific
ptrpBGI-PLK	translational fusion integration vector	Merino et al, 1996
pDH32	transcriptional fusion integration vector	Grandoni et al, 1993
pYH351	-253 to +180 cloned into the EcoRI and BamHI sites of pDH32. Contains PyfmHG-yfmH-lacZ transcriptional fusion.	this study
pYH352	-253 to +239 cloned into the EcoRI and HindIII sites of pTZ19R.	this study
pYH356	-253 to +132 cloned into the EcoRI and HindIII sites of ptrpBGI-PLK. Contains PyfmHG-yfmH’-‘lacZ translational fusion.	this study
pYH358	-253 to +216 cloned into the EcoRI and HindIII sites of ptrpBGI-PLK. Contains PyfmHG-yfmHG’-‘lacZ translational fusion.	this study
pYH361	-253 to +5 cloned into the EcoRI and BamHI sites of pDH32. Contains PyfmHG-lacZ transcriptional fusion.	this study
pYH362	+1 to +180 cloned into the EcoRI and BamHI sites of pDH32. Contains Ptrp-yfmH-lacZ transcriptional fusion.	this study
pYH365	-253 to +239 (A64T:T65A) cloned into the EcoRI and HindIII sites of pTZ19R.	this study
pYH366	-253 to +216 (A64T:T65A) cloned into the EcoRI and HindIII sites of ptrpBGI-PLK. Contains PyfmHG-yfmHG’-‘lacZ translational fusion.	this study
pYH367	-253 to +132 (A64T:T65A) cloned into the EcoRI and HindIII sites of ptrpBGI-PLK. Contains PyfmHG-yfmH’-‘lacZ translational fusion.	this study
pYH368	-253 to +180 (A64T:T65A) cloned into the EcoRI and BamHI sites of pDH32. Contains Ptrp-yfmH-lacZ transcriptional fusion.	this study
	aNumbers indicate the region of cloned yfmHG relative to the start of transcription. Start to stop codon mutations in parentheses. Transformation of strain PLBS338 after linearization of pYH351, pYH356, pYH358, pYH361, pYH362, pYH366, pYH367 and pYH368 with PstI rsulted in integration of the fusion into the amyE locus, resulting in strains PLBS864, PLBS979, PLBS986, PLBS984, PLBS985, PLBS995, PLB…

## Sheet: M.2
Table M.2 Oligos
Oligonucleotide	Sequence	Use
yfmG EcoRI For	CCAGAATTCGGCGATGGTTGCGAATTGGTCA	yfmHG cloning in pTZ19R
yfmG HindIII Rev	CGCAAGCTTGTAAATTGATTTATGATCTTGCATTAATAGAG	yfmHG cloning in pTZ19R
PE2	CCGGGCTAACAATCGA	Primer extension
yfmG EcoRI For	CCAGAATTCGGCGATGGTTGCGAATTGGTCA	PyfmHG-yfmH-lacZ fusion
yfmG TXN Rev	CGCGGATCCGTTTGTTGAAATAAGGAATAGCATTAAATGC	PyfmHG-yfmH-lacZ fusion
yfmG EcoRI For	CCAGAATTCGGCGATGGTTGCGAATTGGTCA	PyfmHG-yfmHG’-‘lacZ fusion
yfmG TLN Rev	GTCCAAGCTTCATTAATAGAGTCAAATTACGATAACCTCCCG	PyfmHG-yfmHG’-‘lacZ fusion
yfmG EcoRI For	CCAGAATTCGGCGATGGTTGCGAATTGGTCA	PyfmHG-lacZ fusion
P Rev BamHI	CCTGGATCCAACTTAAATAAACAATAACAATAAATAGAATAAAAG	PyfmHG-lacZ fusion
trp pr for	GGCGAATTCTTGACAAAAAATACTGAATTGTAATACGATAAGAACAAGTTCTCTGACTATTCTATCAATATTCAGGG	Ptrp-yfmH-lacZ fusion
yfmG TXN Rev	CGCGGATCCGTTTGTTGAAATAAGGAATAGCATTAAATGC	Ptrp-yfmH-lacZ fusion
yfmG EcoRI For	CCAGAATTCGGCGATGGTTGCGAATTGGTCA	PyfmHG-yfmH’-‘lacZ
LP Hind Rev	CGGAAGCTTCCATTTTTCATTAGTATAAAGAACCGGGC	PyfmHG-yfmH’-‘lacZ
ATG to TGA For	AAGGGGGGAAAACCTGAAGAAAATTAAGAAAAAAC	yfmH start to stop codon
ATG to TGA Rev	GTTTTTTCTTAATTTTCTTCAGGTTTTCCCCCCTT	yfmH start to stop codon

## Sheet: W.1
Table W.1 Read trimming
Library	Treatment	DMS	Raw Reads	Filtered Reads	Retained %
A	+AA	-	35088435	25204401	0.718311
B	+AA	-	26356410	19427455	0.737106
C	+AA	-	26021143	23009038	0.884244
D	+AA	+	24683385	20513140	0.831051
E	+AA	+	26579064	21438183	0.806582
F	+AA	+	26058582	21481044	0.824337
G	-AA	-	31864575	27668732	0.868323
H	-AA	-	32692820	31001390	0.948263
I	-AA	-	29694982	23959249	0.806845
J	-AA	+	23763719	21661065	0.911518
K	-AA	+	33536576	29650725	0.884131
L	-AA	+	27778298	22846586	0.822462
		Total	344117989	287861008	0.836518

## Sheet: W.2
Table W.2 Read mapping
W.2.a Transcriptome Wide Mapping
fastq	sam	in_reads	mapped_fract	unique_reads	unique_fract	multi_reads	multi_fract	unmapped_reads	unmapped_fract	time_start	time_end	bowtie2_command
A_R1_trimmed.fastq	A_R1_trimmed_mapped.sam	25204401	71.59	17730252	70.35	313692	1.24	7160457	28.41	Mon Dec 17 13:09:55 2018	Mon Dec 17 13:12:52 2018	bowtie2 -a -p 4 --no-unal -x /usr/local/biocore/Bio_Indexes/bowtie/subtilis_2018 -q A_R1_trimmed.fastq > A_R1_trimmed_mapped.sam
B_R1_trimmed.fastq	B_R1_trimmed_mapped.sam	19427455	78.14	14951743	76.96	229681	1.18	4246031	21.86	Mon Dec 17 13:12:52 2018	Mon Dec 17 13:15:51 2018	bowtie2 -a -p 4 --no-unal -x /usr/local/biocore/Bio_Indexes/bowtie/subtilis_2018 -q B_R1_trimmed.fastq > B_R1_trimmed_mapped.sam
C_R1_trimmed.fastq	C_R1_trimmed_mapped.sam	23009038	80.3	18239652	79.27	236272	1.03	4533114	19.7	Mon Dec 17 13:15:51 2018	Mon Dec 17 13:18:37 2018	bowtie2 -a -p 4 --no-unal -x /usr/local/biocore/Bio_Indexes/bowtie/subtilis_2018 -q C_R1_trimmed.fastq > C_R1_trimmed_mapped.sam
D_R1_trimmed.fastq	D_R1_trimmed_mapped.sam	20513140	78.94	15820106	77.12	373538	1.82	4319496	21.06	Mon Dec 17 13:18:37 2018	Mon Dec 17 13:21:21 2018	bowtie2 -a -p 4 --no-unal -x /usr/local/biocore/Bio_Indexes/bowtie/subtilis_2018 -q D_R1_trimmed.fastq > D_R1_trimmed_mapped.sam
E_R1_trimmed.fastq	E_R1_trimmed_mapped.sam	21438183	79.18	16581674	77.35	393317	1.83	4463192	20.82	Mon Dec 17 13:21:21 2018	Mon Dec 17 13:24:10 2018	bowtie2 -a -p 4 --no-unal -x /usr/local/biocore/Bio_Indexes/bowtie/subtilis_2018 -q E_R1_trimmed.fastq > E_R1_trimmed_mapped.sam
F_R1_trimmed.fastq	F_R1_trimmed_mapped.sam	21481044	74.7	15747039	73.31	298250	1.39	5435755	25.3	Mon Dec 17 13:24:10 2018	Mon Dec 17 13:26:30 2018	bowtie2 -a -p 4 --no-unal -x /usr/local/biocore/Bio_Indexes/bowtie/subtilis_2018 -q F_R1_trimmed.fastq > F_R1_trimmed_mapped.sam
G_R1_trimmed.fastq	G_R1_trimmed_mapped.sam	27668732	77.12	20336615	73.5	1001767	3.62	6330350	22.88	Mon Dec 17 13:26:30 2018	Mon Dec 17 13:31:10 2018	bowtie2 -a -p 4 --no-unal -x /usr/local/biocore/Bio_Indexes/bowtie/subtilis_2018 -q G_R1_trimmed.fastq > G_R1_trimmed_mapped.sam
H_R1_trimmed.fastq	H_R1_trimmed_mapped.sam	31001390	77.95	22832515	73.65	1332889	4.3	6835986	22.05	Mon Dec 17 13:31:10 2018	Mon Dec 17 13:36:04 2018	bowtie2 -a -p 4 --no-unal -x /usr/local/biocore/Bio_Indexes/bowtie/subtilis_2018 -q H_R1_trimmed.fastq > H_R1_trimmed_mapped.sam
I_R1_trimmed.fastq	I_R1_trimmed_mapped.sam	23959249	73.44	16754551	69.93	840779	3.51	6363919	26.56	Mon Dec 17 13:36:04 2018	Mon Dec 17 13:39:28 2018	bowtie2 -a -p 4 --no-unal -x /usr/local/biocore/Bio_Indexes/bowtie/subtilis_2018 -q I_R1_trimmed.fastq > I_R1_trimmed_mapped.sam
J_R1_trimmed.fastq	J_R1_trimmed_mapped.sam	21661065	79.37	16112569	74.38	1079851	4.99	4468645	20.63	Mon Dec 17 13:39:28 2018	Mon Dec 17 13:42:52 2018	bowtie2 -a -p 4 --no-unal -x /usr/local/biocore/Bio_Indexes/bowtie/subtilis_2018 -q J_R1_trimmed.fastq > J_R1_trimmed_mapped.sam
K_R1_trimmed.fastq	K_R1_trimmed_mapped.sam	29650725	78	21427456	72.27	1698827	5.73	6524442	22	Mon Dec 17 13:42:52 2018	Mon Dec 17 13:47:39 2018	bowtie2 -a -p 4 --no-unal -x /usr/local/biocore/Bio_Indexes/bowtie/subtilis_2018 -q K_R1_trimmed.fastq > K_R1_trimmed_mapped.sam
L_R1_trimmed.fastq	L_R1_trimmed_mapped.sam	22846586	81.02	17519252	76.68	991886	4.34	4335448	18.98	Mon Dec 17 13:47:39 2018	Mon Dec 17 13:51:19 2018	bowtie2 -a -p 4 --no-unal -x /usr/local/biocore/Bio_Indexes/bowtie/subtilis_2018 -q L_R1_trimmed.fastq > L_R1_trimmed_mapped.sam
W.2.b Targeted Analysis Mapping
fastq	sam	in_reads	mapped_fract	unique_reads	unique_fract	multi_reads	multi_fract	unmapped_reads	unmapped_fract	time_start	time_end	bowtie2_command
A_R1_trimmed.fastq	A_R1_trimmed_mapped.sam	25204401	1.91	481163	1.91	984	0	24722254	98.09	Fri Jan 31 10:28:48 2020	Fri Jan 31 10:29:44 2020	bowtie2 -a -p 4 --no-unal -x /usr/local/biocore/Bio_Indexes/bowtie/Laura_custom_genes_bacillus -q A_R1_trimmed.fastq > A_R1_trimmed_mapped.sam
B_R1_trimmed.fastq	B_R1_trimmed_mapped.sam	19427455	1.87	362554	1.87	300	0	19064601	98.13	Fri Jan 31 10:29:44 2020	Fri Jan 31 10:30:28 2020	bowtie2 -a -p 4 --no-unal -x /usr/local/biocore/Bio_Indexes/bowtie/Laura_custom_genes_bacillus -q B_R1_trimmed.fastq > B_R1_trimmed_mapped.sam
C_R1_trimmed.fastq	C_R1_trimmed_mapped.sam	23009038	1.97	451660	1.96	1005	0	22556373	98.03	Fri Jan 31 10:30:28 2020	Fri Jan 31 10:31:11 2020	bowtie2 -a -p 4 --no-unal -x /usr/local/biocore/Bio_Indexes/bowtie/Laura_custom_genes_bacillus -q C_R1_trimmed.fastq > C_R1_trimmed_mapped.sam
D_R1_trimmed.fastq	D_R1_trimmed_mapped.sam	20513140	1.64	335575	1.64	546	0	20177019	98.36	Fri Jan 31 10:31:11 2020	Fri Jan 31 10:31:50 2020	bowtie2 -a -p 4 --no-unal -x /usr/local/biocore/Bio_Indexes/bowtie/Laura_custom_genes_bacillus -q D_R1_trimmed.fastq > D_R1_trimmed_mapped.sam
E_R1_trimmed.fastq	E_R1_trimmed_mapped.sam	21438183	1.58	337808	1.58	380	0	21099995	98.42	Fri Jan 31 10:31:50 2020	Fri Jan 31 10:32:32 2020	bowtie2 -a -p 4 --no-unal -x /usr/local/biocore/Bio_Indexes/bowtie/Laura_custom_genes_bacillus -q E_R1_trimmed.fastq > E_R1_trimmed_mapped.sam
F_R1_trimmed.fastq	F_R1_trimmed_mapped.sam	21481044	1.52	326894	1.52	601	0	21153549	98.48	Fri Jan 31 10:32:32 2020	Fri Jan 31 10:33:11 2020	bowtie2 -a -p 4 --no-unal -x /usr/local/biocore/Bio_Indexes/bowtie/Laura_custom_genes_bacillus -q F_R1_trimmed.fastq > F_R1_trimmed_mapped.sam
G_R1_trimmed.fastq	G_R1_trimmed_mapped.sam	27668732	2.93	807243	2.92	3568	0.01	26857921	97.07	Fri Jan 31 10:33:11 2020	Fri Jan 31 10:34:20 2020	bowtie2 -a -p 4 --no-unal -x /usr/local/biocore/Bio_Indexes/bowtie/Laura_custom_genes_bacillus -q G_R1_trimmed.fastq > G_R1_trimmed_mapped.sam
H_R1_trimmed.fastq	H_R1_trimmed_mapped.sam	31001390	2.28	694106	2.24	12757	0.04	30294527	97.72	Fri Jan 31 10:34:20 2020	Fri Jan 31 10:35:26 2020	bowtie2 -a -p 4 --no-unal -x /usr/local/biocore/Bio_Indexes/bowtie/Laura_custom_genes_bacillus -q H_R1_trimmed.fastq > H_R1_trimmed_mapped.sam
I_R1_trimmed.fastq	I_R1_trimmed_mapped.sam	23959249	3.1	737670	3.08	5178	0.02	23216401	96.9	Fri Jan 31 10:35:26 2020	Fri Jan 31 10:36:17 2020	bowtie2 -a -p 4 --no-unal -x /usr/local/biocore/Bio_Indexes/bowtie/Laura_custom_genes_bacillus -q I_R1_trimmed.fastq > I_R1_trimmed_mapped.sam
J_R1_trimmed.fastq	J_R1_trimmed_mapped.sam	21661065	2.64	567777	2.62	3724	0.02	21089564	97.36	Fri Jan 31 10:36:17 2020	Fri Jan 31 10:37:03 2020	bowtie2 -a -p 4 --no-unal -x /usr/local/biocore/Bio_Indexes/bowtie/Laura_custom_genes_bacillus -q J_R1_trimmed.fastq > J_R1_trimmed_mapped.sam
K_R1_trimmed.fastq	K_R1_trimmed_mapped.sam	29650725	1.91	560887	1.89	6041	0.02	29083797	98.09	Fri Jan 31 10:37:03 2020	Fri Jan 31 10:38:06 2020	bowtie2 -a -p 4 --no-unal -x /usr/local/biocore/Bio_Indexes/bowtie/Laura_custom_genes_bacillus -q K_R1_trimmed.fastq > K_R1_trimmed_mapped.sam
L_R1_trimmed.fastq	L_R1_trimmed_mapped.sam	22846586	2.58	585299	2.56	3629	0.02	22257658	97.42	Fri Jan 31 10:38:06 2020	Fri Jan 31 10:38:57 2020	bowtie2 -a -p 4 --no-unal -x /usr/local/biocore/Bio_Indexes/bowtie/Laura_custom_genes_bacillus -q L_R1_trimmed.fastq > L_R1_trimmed_mapped.sam

## Sheet: W.3
Table W.3 Filtering read mappings
W.3.a Transcriptome Wide Filtering
in_sam	sam_lines	filtered_lines	sam_filter_flag	flag_options	mismatches_and_first_mismatch	mismatches	first_mismatch	header_lines	max_mismatch	out_sam	out_sam_lines
A_R1_trimmed_mapped.sam	18365711	17858771	20	unmapped reverse_strand	534049	579926	4487842	4177	3	A_R1_trimmed_mapped_filtered.sam	12252777
B_R1_trimmed_mapped.sam	15417970	15231728	20	unmapped reverse_strand	451090	515003	4119729	4177	3	B_R1_trimmed_mapped_filtered.sam	10141729
C_R1_trimmed_mapped.sam	18721315	18486895	20	unmapped reverse_strand	284192	279912	5906133	4177	3	C_R1_trimmed_mapped_filtered.sam	12012481
D_R1_trimmed_mapped.sam	16575067	16396584	20	unmapped reverse_strand	306924	526201	2456836	4177	3	D_R1_trimmed_mapped_filtered.sam	13102446
E_R1_trimmed_mapped.sam	17377063	17176914	20	unmapped reverse_strand	410534	728300	2697806	4177	3	E_R1_trimmed_mapped_filtered.sam	13336097
F_R1_trimmed_mapped.sam	16351490	16059987	20	unmapped reverse_strand	254773	407342	2652275	4177	3	F_R1_trimmed_mapped_filtered.sam	12741420
G_R1_trimmed_mapped.sam	22352721	21999922	20	unmapped reverse_strand	763034	714890	6155818	4177	3	G_R1_trimmed_mapped_filtered.sam	14362003
H_R1_trimmed_mapped.sam	25517247	25174312	20	unmapped reverse_strand	692015	584694	7549929	4177	3	H_R1_trimmed_mapped_filtered.sam	16343497
I_R1_trimmed_mapped.sam	18447381	18013643	20	unmapped reverse_strand	467353	414777	4642448	4177	3	I_R1_trimmed_mapped_filtered.sam	12484888
J_R1_trimmed_mapped.sam	18283254	18069032	20	unmapped reverse_strand	462927	836628	2718790	4177	3	J_R1_trimmed_mapped_filtered.sam	14046510
K_R1_trimmed_mapped.sam	24843697	24636533	20	unmapped reverse_strand	906618	1341442	4739869	4177	3	K_R1_trimmed_mapped_filtered.sam	17644427
L_R1_trimmed_mapped.sam	19515966	19296342	20	unmapped reverse_strand	614838	1074442	3194956	4177	3	L_R1_trimmed_mapped_filtered.sam	14407929
W.3.b Targeted Analysis Filtering
in_sam	sam_lines	filtered_lines	sam_filter_flag	flag_options	mismatches_and_first_mismatch	mismatches	first_mismatch	header_lines	max_mismatch	out_sam	out_sam_lines
A_R1_trimmed_mapped.sam	483219	481991	20	unmapped reverse_strand	21134	20673	116131	33	3	A_R1_trimmed_mapped_filtered.sam	324020
B_R1_trimmed_mapped.sam	363205	362518	20	unmapped reverse_strand	8194	10170	85611	33	3	B_R1_trimmed_mapped_filtered.sam	258510
C_R1_trimmed_mapped.sam	453748	453233	20	unmapped reverse_strand	6976	7763	145187	33	3	C_R1_trimmed_mapped_filtered.sam	293274
D_R1_trimmed_mapped.sam	336722	336113	20	unmapped reverse_strand	5582	8479	48014	33	3	D_R1_trimmed_mapped_filtered.sam	274005
E_R1_trimmed_mapped.sam	338632	338001	20	unmapped reverse_strand	7797	11824	53874	33	3	E_R1_trimmed_mapped_filtered.sam	264473
F_R1_trimmed_mapped.sam	328161	327372	20	unmapped reverse_strand	4194	6449	55240	33	3	F_R1_trimmed_mapped_filtered.sam	261456
G_R1_trimmed_mapped.sam	814448	813256	20	unmapped reverse_strand	27312	43569	189216	33	3	G_R1_trimmed_mapped_filtered.sam	553126
H_R1_trimmed_mapped.sam	719665	718527	20	unmapped reverse_strand	18883	31670	193338	33	3	H_R1_trimmed_mapped_filtered.sam	474603
I_R1_trimmed_mapped.sam	748122	747156	20	unmapped reverse_strand	16610	30184	152826	33	3	I_R1_trimmed_mapped_filtered.sam	547503
J_R1_trimmed_mapped.sam	575328	574420	20	unmapped reverse_strand	14036	25681	90163	33	3	J_R1_trimmed_mapped_filtered.sam	444507
K_R1_trimmed_mapped.sam	573063	572121	20	unmapped reverse_strand	16666	27567	111515	33	3	K_R1_trimmed_mapped_filtered.sam	416340
L_R1_trimmed_mapped.sam	592672	591744	20	unmapped reverse_strand	16616	29332	101650	33	3	L_R1_trimmed_mapped_filtered.sam	444113

## Sheet: W.4
Table W.4 Library specificity
(-) DMS
base	+AA_count	+AA_specificity	-AA_count	-AA_specificity
A	9123905	0.268188	15326888	0.356277
T	10099174	0.296855	10036022	0.233289
G	4784669	0.140641	8677829	0.201718
C	10012801	0.294316	8978888	0.208716
(+) DMS
base	+AA_count	+AA_specificity	-AA_count	-AA_specificity
A	24144983	0.619581	27859178	0.60549
T	4369520	0.112126	5198364	0.112981
G	3815365	0.0979055	5401955	0.117406
C	6640020	0.170388	7551443	0.164123

## Sheet: T.1
Table T.1 Repeatability of DMS Modification
Treatment	Replicate A	Replicate B	r	p	n
+AA	D	E	0.897625	< 2.2E-016	1253919
	E	F	0.90247	< 2.2E-016	1253919
	F	D	0.88821	< 2.2E-016	1253919
-AA	J	K	0.812319	< 2.2E-016	1292466
	K	L	0.91742	< 2.2E-016	1292466
	L	J	0.896714	< 2.2E-016	1292466

## Sheet: T.2
Table T.2 Comparison of Reactivity
Transcript Mean Reactivity	n	+AA Mean	-AA Mean	Mean t.test p	Correlation (r)	correlation p
Whole Transcript	2333	0.277985	0.24108	< 2.2e-16	0.476043	< 2.2e-16
5’UTR	878	0.234403	0.195406	8.523e-08	0.550126	< 2.2e-16
CDS	2333	0.276987	0.241	< 2.2e-16	0.506138	< 2.2e-16
3’UTR	316	0.198815	0.164996	0.002774	0.716096	< 2.2e-16
Transcript Gini Reactivity	+AA Gini	-AA Gini	n	p	Correlation (r)	correlation p
Whole Transcript	0.669767	0.672797	2333	0.07308	0.595799	< 2.2e-16
5’UTR	0.689724	0.716117	878	6.625e-05	0.621659	< 2.2e-16
CDS	0.671516	0.673702	2333	0.2068	0.597697	< 2.2e-16
3’UTR	0.74837	0.776952	316	0.005801	0.656249	< 2.2e-16

## Sheet: T.3
Table T.3 Correlation of Δ reactivity to Δ abundance
	r	p	n
Whole Transcript	-0.827842	< 2.2e-16	2333
5’UTR	-0.343721	< 2.2e-16	878
CDS	-0.816752	< 2.2e-16	2333
3’UTR	-0.101623	0.07123	316

[truncated: 17 more sheets: T.4, D.1, D.2, D.3, D.4, D.5, D.6, D.7, D.8, D.9, D.10, L.1, L.2, L.3, L.4, L.5, L.6]
